# Supplementary material for: Learning curve for laparoendoscopic single-site radical hysterectomy using the “chopstick” technique: a retrospective cohort study
Source: PubMed Central journal article supplement — Ann Transl Med. 2022 Nov;10(21):1165. doi: 10.21037/atm-22-4447 (PMC9708472; doi:10.21037/atm-22-4447), 2022-11
Supplement: atm-10-21-1165-dss.pdf [file atm-10-21-1165-dss.pdf]

## Data Sharing Statement

|                     |                                                                                                                                                     |                                                                                                                          |
|---------------------|-----------------------------------------------------------------------------------------------------------------------------------------------------|--------------------------------------------------------------------------------------------------------------------------|
| <b>Article Info</b> | <a href="https://dx.doi.org/10.21037/atm-22-4447">https://dx.doi.org/10.21037/atm-22-4447</a>                                                       |                                                                                                                          |
| <b>Item</b>         | <b>Question</b>                                                                                                                                     | <b>Authors' Response<br/>(place "-" if not applicable)</b>                                                               |
| 1                   | Would you like to share data collected for your study to others?                                                                                    | Yes.                                                                                                                     |
| 2                   | If not, would you like to share the reason for your decision?                                                                                       | -                                                                                                                        |
| 3                   | What data in particular will be shared?                                                                                                             | The sequence and outcome of the operation in particular will be shared, especially the operation time and complications. |
| 4                   | Any other documents will be shared? Such as study protocol, statistical analysis plan, informed consent form, clinical study report, analytic code. | Statistical analysis plan and analytic code will also be shared if requested.                                            |
| 5                   | When will data availability begin?                                                                                                                  | From the publication date.                                                                                               |
| 6                   | When will data availability end?                                                                                                                    | Two years within the publication date.                                                                                   |
| 7                   | To whom will you share the data?                                                                                                                    | Gynecological oncologist who are interested in studies of LESS.                                                          |
| 8                   | For what type of analysis or purpose?                                                                                                               | For analysis to evaluate the safety of LESS-RH.                                                                          |
| 9                   | How or where can the data/documents be obtained?                                                                                                    | Emails could be sent to the address below to obtain the shared data: denglitmmu@163.com.                                 |
| 10                  | Any other restrictions?                                                                                                                             | We may balance the potential benefits and risks for each request and then provide the data that could be shared.         |
